# Supplementary material for: Molecular imaging of myogenic stem/progenitor cells with [18F]-FHBG PET/CT system in SCID mice model of post-infarction heart
Source: PubMed Central journal article supplement (PMC8494811; doi:10.1038/s41598-021-98861-5), 2021-10-06

**Molecular imaging of myogenic stem/progenitor cells with [<sup>18</sup>F]-FHBG PET/CT system in SCID mice model of post-infarction heart.**

**European Journal of Nuclear Medicine and Molecular Imaging**

Weronika Wargoicka-Matuszewska <sup>1</sup>, Katarzyna Fiedorowicz <sup>2</sup>, Anna Rugowska <sup>3</sup>, Karolina Bednarowicz <sup>2</sup>, Agnieszka Zimna <sup>2</sup>, Łukasz Cheda <sup>1</sup>, Paulina Hamankiewicz <sup>1</sup>, Krzysztof Kilian <sup>4</sup>, Michał Fiedorowicz <sup>5</sup>, Monika Drabik <sup>5</sup>, Natalia Rozwadowska <sup>2</sup>, Zbigniew Rogulski <sup>1\*</sup>, Maciej Kurpisz <sup>2\*</sup>

<sup>1</sup> Faculty of Chemistry, Biological and Chemical Research Centre, University of Warsaw, Żwirki i Wigury 101, 02-089 Warsaw, Poland

<sup>2</sup> Institute of Human Genetics Polish Academy of Science, Strzeszyńska 32, 60-479 Poznań, Poland

<sup>3</sup> Institute of Human Biology and Evolution, Faculty of Biology Adam Mickiewicz University, Uniwersytetu Poznańskiego 6, 61-614 Poznań, Poland

<sup>4</sup> Heavy Ion Laboratory University of Warsaw, Pasteura 5A, 02-093 Warsaw, Poland

<sup>5</sup> Mossakowski Medical Research Centre Polish Academy of Science, Pawińskiego 5, 02-106 Warsaw, Poland

\* Corresponding authors:

Zbigniew Rogulski

Faculty of Chemistry, Biological and Chemical Research Centre, University of Warsaw, Żwirki i Wigury 101, 02-089 Warsaw, Poland

ORCID ID 0000-0002-2372-850X

rogul@chem.uw.edu.pl

Maciej Kurpisz

Institute of Human Genetics Polish Academy of Science, Strzeszyńska 32, 60-479 Poznań, Poland

ORCID ID 0000-0003-3275-3245

maciej.kurpisz@igcz.poznan.pl

**Supplementary Fig. S1** Comparison of SAX/END in control and post-infarction mice

Measurements were taken before induction of myocardial infarction and 17 days after the formation of the post-infarction scar, and p-values are shown as the mean  $\pm$  SD; \*p < 0.05, \*\*p < 0.01, \*\*\*p < 0.001.

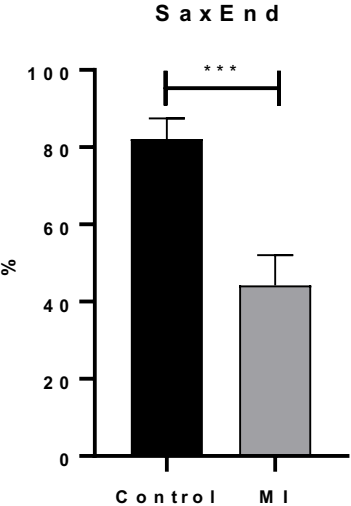

**Supplementary Fig. S2** Functional and metabolic heart characteristics

Standard uptake values of all four groups of mice. SUVs are given as mean +/- SD.

| Mice           | %iD/g |      |
|----------------|-------|------|
|                | SUV   | SD   |
| Control(-)     | 14,45 | 0,92 |
| MI(-)          | 15,48 | 0,8  |
| MI(+)          | 16,60 | 1,33 |
| Control/saline | 26,24 | 1,67 |

**Supplementary Fig. S3** Cellular huSkMDS/PCs EF1-HSV-TK [<sup>18</sup>F]-FHBG PET Imaging

Standard uptake values of two groups of mice. SUVs are shown as the mean +/- SD for heart, kidney, lung, liver, and bladder.

| Mice       | Day    | Heart |      | Kidneys |      | Liver |      | Lungs |      | Bladder |       |
|------------|--------|-------|------|---------|------|-------|------|-------|------|---------|-------|
|            |        | SUV   | SD   | SUV     | SD   | SUV   | SD   | SUV   | SD   | SUV     | SD    |
| Control(+) | Day 14 | 7,95  | 0,51 | 1,39    | 0,75 | 0,63  | 0,77 | 0,40  | 0,13 | 438,43  | 36,64 |
|            | Day 33 | 5,97  | 0,35 | 1,01    | 0,65 | 0,44  | 0,48 | 0,33  | 0,25 | 270,65  | 25,72 |
| MI(+)      | Day 14 | 6,13  | 0,69 | 1,15    | 0,55 | 0,42  | 0,37 | 0,37  | 0,19 | 287,73  | 33,24 |
|            | Day 33 | 5,94  | 0,44 | 0,83    | 0,42 | 0,36  | 0,20 | 0,29  | 0,09 | 119,77  | 10,04 |

**Supplementary Fig. S4** Metabolic heart activity (viability) measured through glucose uptake

Standard uptake values for dual cardiac viability PET imaging in of two groups of mice. SUVs are shown as the mean +/- SD.

| Mice       | Day    | %iD/g |      |
|------------|--------|-------|------|
|            |        | SUV   | SD   |
| Control(-) | Day 7  | 14,17 | 0,87 |
|            | Day 40 | 18,92 | 1,06 |
| MI(+)      | Day 7  | 16,60 | 1,38 |
|            | Day 40 | 15,44 | 1,14 |

**Supplementary Fig. S5** Representative images of end-diastolic and end-systolic volumes from the short and long axes of mice intracardially injected with saline.

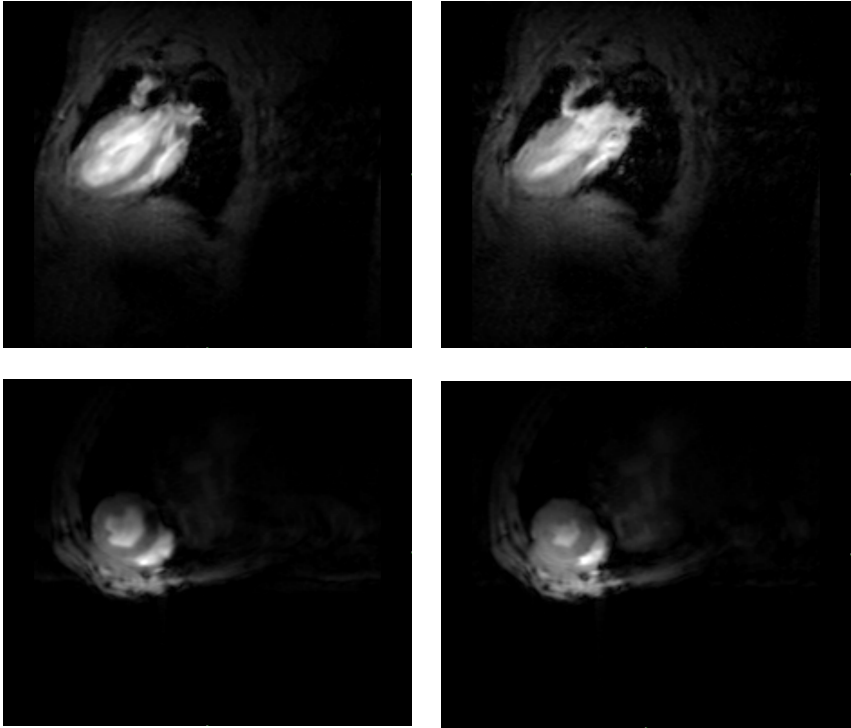

**Supplementary Fig. S6** Haemodynamic analysis of intact control hearts and after saline administration. The results are shown as the mean +/- SD; \* p <0.05; \*\* p <0.01 Mann-Whitney U test.

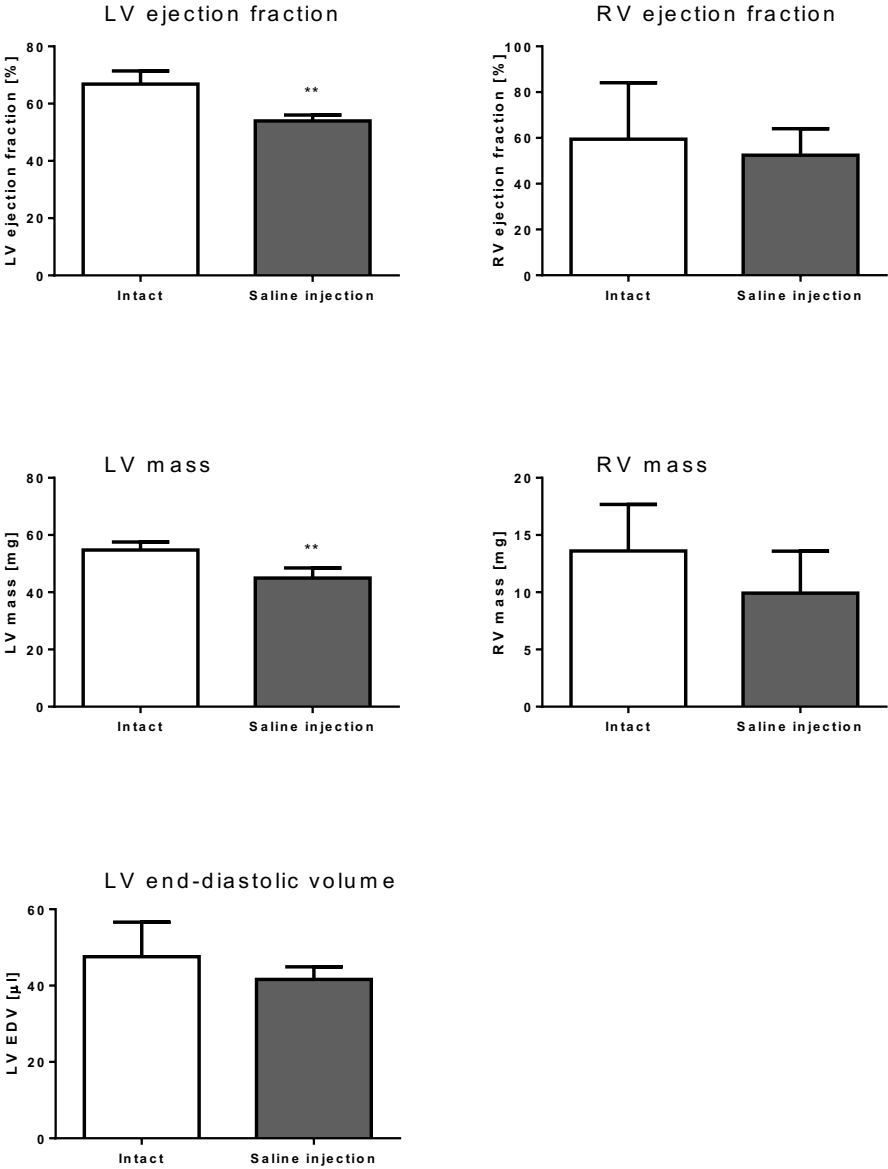

**Supplementary Fig. S7** Experimental design

The graph shows all stages of the experimental procedures included in the study of the post-infarction mouse model with huSkMDS/PC EF1-HSV-TK interventions.

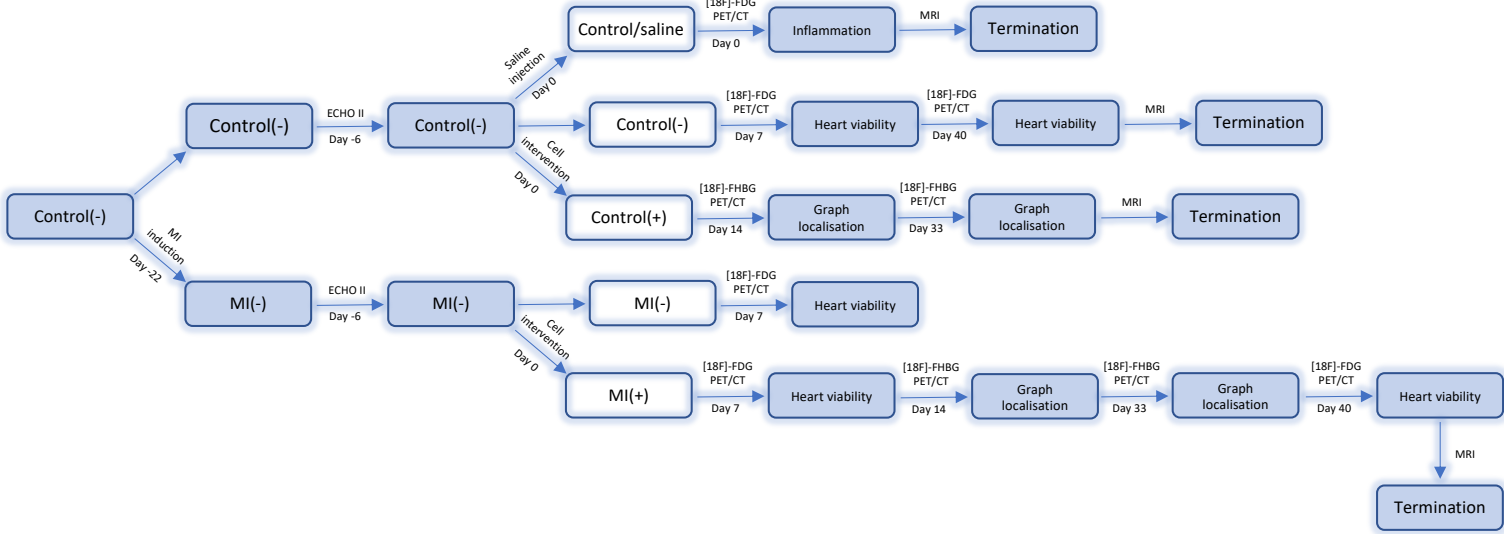



**Supplementary Table S1** Primary and secondary antibodies used for immunofluorescence

| Antibody                      | Manufacturer            | Characteristics                            | Dilution |
|-------------------------------|-------------------------|--------------------------------------------|----------|
| mouse anti-desmin             | Abcam                   | Myogenic                                   | 1:200    |
| mouse anti-heavy chain myosin | Cambridge (UK)          | markers                                    | 1:400    |
| anti-mouse Alexa Fluor 488    | Abcam<br>Cambridge (UK) | Fluorochrome conjugated secondary antibody | 1:500    |

**Supplementary Fig. S8** Construction of lentiviral vector

EF1-HSV-TK-*renluc*-CMV-*mCherry*-*PuroR*: *Renilla luciferase* (Renluc) and thymidine kinase (HSV-TK) expression is controlled by constitutively expressed promoter, elongation factor 1 (EF1), mCMV constitutive promoter controls expression of mCherry and puromycin resistance (*PuroR*).

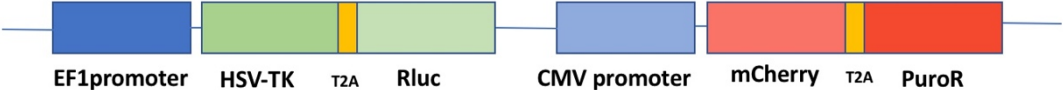

**Supplementary Fig. S9** Quality control of [<sup>18</sup>F]-FHBG (RadioHPLC). Chromatogram: 1 - fluorine-18, 2 - [<sup>18</sup>F]-FHBG.

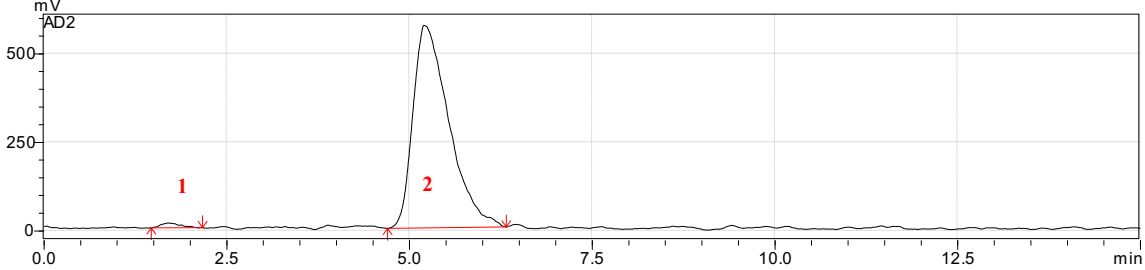

Supplement: 41598_2021_98861_MOESM1_ESM.pdf [file 41598_2021_98861_MOESM1_ESM.pdf]
